# Supplementary material for: Treatment of adult metachromatic leukodystrophy model mice using intrathecal administration of type 9 AAV vector encoding arylsulfatase A
Source: PubMed Central journal article supplement (PMC8521568; doi:10.1038/s41598-021-99979-2), 2021-10-15
Supplement: 41598_2021_99979_MOESM1_ESM.pdf [file 41598_2021_99979_MOESM1_ESM.pdf]

**Treatment of adult metachromatic leukodystrophy model mice using intrathecal administration of type 9 AAV vector encoding arylsulfatase A**

Noriko Miyake<sup>1</sup>, Koichi Miyake<sup>2</sup>, Atsushi Sakai<sup>3</sup>, Motoko Yamamoto<sup>1</sup>, Hidenori Suzuki<sup>3</sup>,  
Takashi Shimada<sup>1</sup>

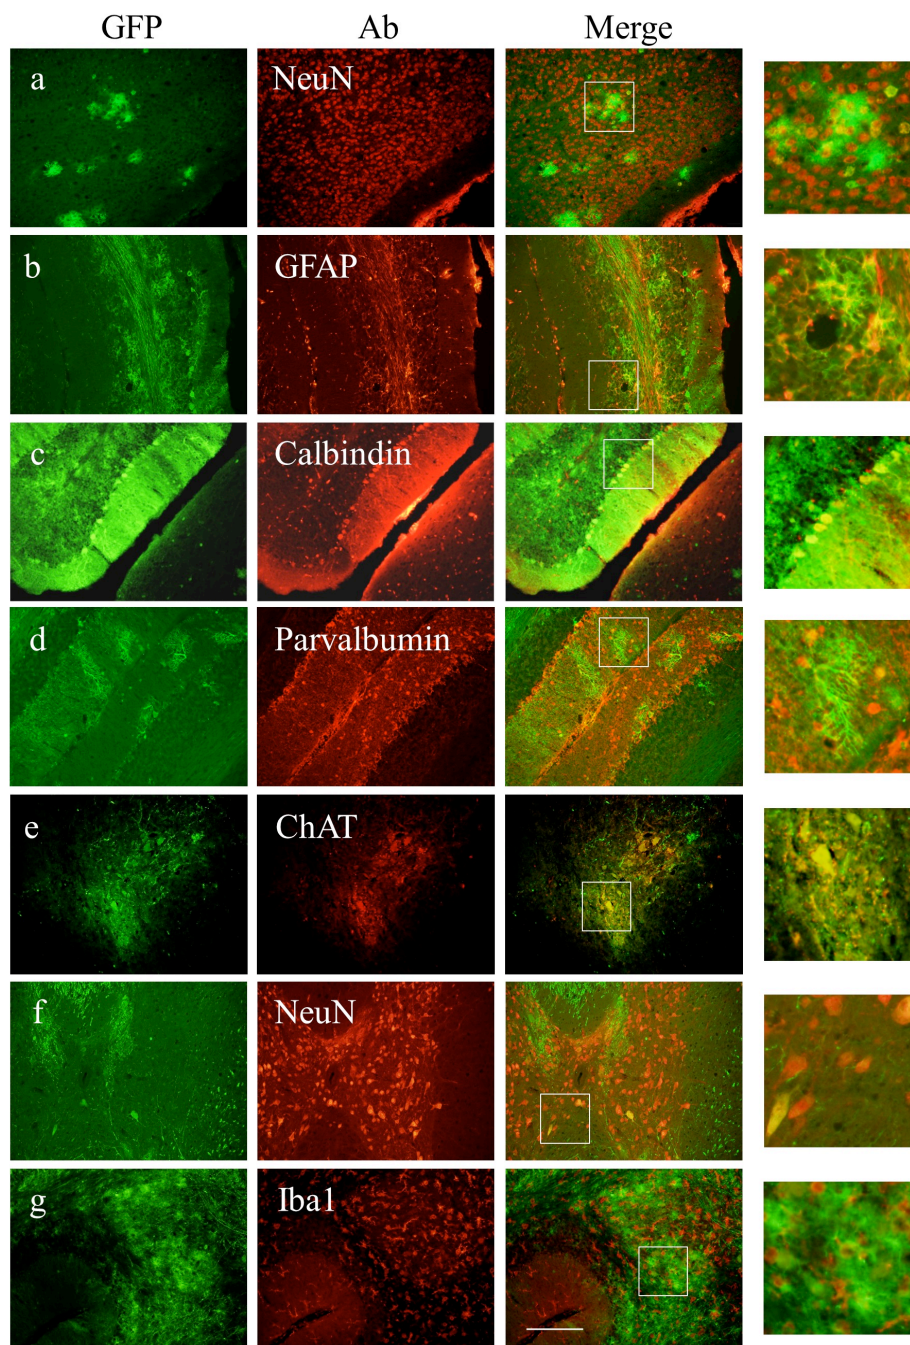

**Supplementary Figure S1. Immunohistochemical analysis of transduced cells in the brain and spinal cord of treated MLD mice at 6 week of age**

Immunostaining for GFP and the neuronal marker NeuN in the striatum (a), the astrocyte marker GFAP (b), the Purkinje marker calbindin (c), the basket marker parvalbumin in the cerebellum (d), the microglia marker Iba1 (g) in the brain, and ChAT-positive motor neurons (e) and NeuN-positive neurons (f) in the cervical spinal cord. Bar: 200  $\mu$ M. Panels on the right highlight the observed co-localization.

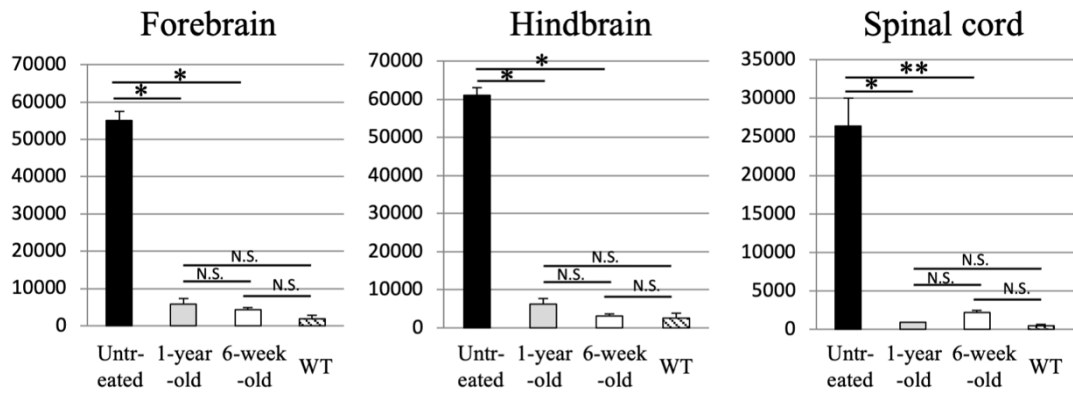

**Supplementary Figure S2. Correction of sulfatide storage in the brain and spinal cord.**

Quantified of sulfatide storage per mm<sup>2</sup> in the forebrain, hindbrain and cervical spinal cord of MLD mice left untreated (closed bars, n =5), MLD mice treated at 1 year (gray bars, n =5) or 6 weeks of age (open bars, n=4), and wild-type (WT) mice (diagonally hatched bars, n=8).

\* P<0.0001, \*\*p<0.003

**Supplementary Table S1. Raw data calculated from thin layer chromatography plates**

| Forebrain    |                   |                   | Hindbrain |              |       |       | Spinal cord |              |      |       |           |
|--------------|-------------------|-------------------|-----------|--------------|-------|-------|-------------|--------------|------|-------|-----------|
|              | Sulf <sup>a</sup> | GalC <sup>b</sup> | Sulf/GalC |              | Sulf  | GalC  | Sulf/GalC   |              | Sulf | GalC  | Sulf/GalC |
| Untreated-1  | 23884             | 25816             | 0.925163  | Untreated-1  | 22148 | 27188 | 0.814624    | Untreated-1  | 5017 | 12151 | 0.412888  |
| Untreated-2  | 17388             | 22400             | 0.77625   | Untreated-2  | 15176 | 20832 | 0.728495    | Untreated-2  | 4321 | 11484 | 0.376263  |
| Untreated-3  | 24600             | 27330             | 0.90011   | Untreated-3  | 31744 | 45105 | 0.70378     | Untreated-3  | 3538 | 9599  | 0.36858   |
| Untreated-4  | 28050             | 31620             | 0.887097  | Untreated-4  | 28055 | 49600 | 0.565625    | Untreated-4  | 5278 | 11513 | 0.458438  |
| Untreated-5  | 15750             | 20640             | 0.763081  | Untreated-5  | 22940 | 36394 | 0.630324    | Untreated-5  | 3596 | 9512  | 0.378049  |
| Untreated-6  | 23280             | 24630             | 0.945189  | Untreated-6  | 17205 | 29481 | 0.583596    | Untreated-6  | 4350 | 12847 | 0.3386    |
| 1-year-old-1 | 17976             | 23632             | 0.760664  | 1-year-old-1 | 17416 | 27468 | 0.634047    | 1-year-old-1 | 3306 | 14094 | 0.234568  |
| 1-year-old-2 | 19488             | 23548             | 0.827586  | 1-year-old-2 | 15148 | 29652 | 0.510859    | 1-year-old-2 | 3219 | 13659 | 0.235669  |
| 1-year-old-3 | 16296             | 23380             | 0.697006  | 1-year-old-3 | 11648 | 22036 | 0.52859     | 1-year-old-3 | 4582 | 15950 | 0.287273  |
| 1-year-old-4 | 16352             | 24332             | 0.672037  | 1-year-old-4 | 13524 | 26544 | 0.509494    | 1-year-old-4 | 2581 | 10005 | 0.257971  |
| 1-year-old-5 | 18060             | 23070             | 0.782835  | 1-year-old-5 | 15988 | 27216 | 0.587449    | 1-year-old-5 | 1595 | 6873  | 0.232068  |
| 6-week-old-1 | 17280             | 23640             | 0.730964  | 6-week-old-1 | 23808 | 41509 | 0.573562    | 6-week-old-1 | 2059 | 9396  | 0.219136  |
| 6-week-old-2 | 15720             | 25350             | 0.620118  | 6-week-old-2 | 20181 | 38936 | 0.518312    | 6-week-old-2 | 3538 | 12325 | 0.287059  |
| 6-week-old-3 | 16140             | 21420             | 0.753501  | 6-week-old-3 | 12431 | 29791 | 0.417274    | 6-week-old-3 | 1740 | 6525  | 0.266667  |
| 6-week-old-4 | 8820              | 16950             | 0.520354  | 6-week-old-4 | 9300  | 30256 | 0.307377    | 6-week-old-4 | 1044 | 4263  | 0.244898  |
| WT-1         | 806               | 3720              | 0.216667  | WT-1         | 4710  | 16290 | 0.289134    | WT-1         | 1376 | 4478  | 0.30730   |
| WT-2         | 992               | 3751              | 0.264463  | WT-2         | 5550  | 17790 | 0.311973    | WT-2         | 1073 | 3775  | 0.28409   |
| WT-3         | 1023              | 3844              | 0.266129  | WT-3         | 5700  | 19500 | 0.292308    | WT-3         | 941  | 3376  | 0.27859   |
| WT-4         | 1116              | 4433              | 0.251748  | WT-4         | 3900  | 16800 | 0.232143    | WT-4         | 818  | 2970  | 0.27556   |
| WT-5         | 1178              | 4712              | 0.25      | WT-5         | 4320  | 15840 | 0.272727    | WT-5         | 970  | 3198  | 0.30341   |
| WT-6         | 899               | 5487              | 0.163842  | WT-6         | 4768  | 13472 | 0.353919    | WT-6         | 835  | 2858  | 0.29215   |
| WT-7         | 806               | 5053              | 0.159509  | WT-7         | 4832  | 17312 | 0.279113    | WT-7         | 1089 | 3713  | 0.29333   |
| WT-8         | 1085              | 5332              | 0.203488  | WT-8         | 6240  | 24224 | 0.257596    | WT-8         | 1096 | 3356  | 0.32645   |
| WT-9         | 1457              | 5332              | 0.273256  |              |       |       |             | WT-9         | 805  | 2878  | 0.27982   |
| WT-10        | 1271              | 4557              | 0.278912  |              |       |       |             | WT-10        | 1003 | 3524  | 0.28464   |

<sup>a</sup>Sulf, sulfatide; <sup>b</sup>GalC, galactosylceramide;
